# Supplementary material
Source: Elsevier journal article supplement (https://www.sciencedirect.com/science/article/pii/S0213911118301365)
Supplement: mmc1 [file S0213911118301365:mmc1.docx]

**Apéndice. Material suplementario**

Puede consultarse material adicional a este artículo en su versión electrónica disponible en doi:10.1016….
